# Supplementary material
Source: publisher figshare collection journal article supplement (https://geolsoc.figshare.com/ndownloader/files/5425052)
Supplement: Supplementary file 1 [file 5425052]

	SiO2	TiO2	Al2O3	Cr2O3	V2O3	FeO	MnO	MgO	CaO	Na2O	K2O	NiO	ZnO
Olivine														Fo
Olv.1 Core	41.172	0.027				9.338	0.183	48.767	0.361			0.436		90.1
Olv.1 Rim	40.824					10.236	0.201	47.781	0.348			0.429		89.1
Olv.2 Core	40.496					11.904	0.268	46.934	0.308			0.417		87.3
Olv.2 Rim	40.610	0.050	0.012			11.383	0.202	47.187	0.330			0.270		87.9
Olv.3 Core	40.172					15.093	0.213	44.016	0.333			0.324		83.6
Olv.3 Rim	40.307					13.435	0.181	45.370	0.377			0.209		85.6
Olv.4 Core	41.035					8.952	0.196	48.996	0.370			0.273		90.5
Olv.4 Rim	40.315					13.554	0.269	45.070	0.376			0.254		85.3
Olv.5 Core	40.557	0.010				14.056	0.100	45.246	0.374			0.309		85.1
Olv.5 Rim	40.951					11.912	0.086	46.272	0.362			0.170		87.3
Olv.6 Core	41.279	0.037				8.845	0.098	49.257	0.359			0.321		90.8
Olv.6 Rim	40.832					10.415	0.312	47.667	0.294			0.497		88.7
Olv.7 Core	40.305	0.085				12.539	0.139	46.597	0.270			0.154		86.8
Olv.7 Rim	40.747					12.267	0.272	46.645	0.322			0.247		86.9
Olv.8 Core	41.117					8.782	0.131	49.000	0.377			0.181		90.7
Olv.8 Rim	40.705					10.964	0.153	47.656	0.364			0.357		88.4
Clinopyroxene														Fs	En	Wo
Cpx.1	44.915	0.871	13.706	0.141		8.208	0.204	14.053	16.967	0.358				15.2	45.4	39.4
Cpx.2	45.237	0.879	13.583	0.114		8.119	0.151	14.030	17.470	0.340	0.051			14.9	44.9	40.2
Cpx.3	44.858	1.055	13.175	0.037		7.700	0.160	13.630	18.935	0.359				13.9	43.1	43.0
Cpx.4	47.447	2.001	6.452	0.162		9.342	0.247	12.057	21.411	0.426	0.004			16.4	36.7	46.9
Cpx.5	48.105	1.301	6.708	0.117		9.436	0.130	12.378	21.150	0.486	0.022			16.3	37.6	46.1
Cpx.6	49.619	1.127	4.824	0.309		9.085	0.128	13.309	21.263	0.477				15.3	39.4	45.3
Cpx.7	49.091	1.373	5.568	0.269		8.367	0.149	13.220	22.081	0.462				14.1	39.0	46.9
Plagioclase														An	Ab	Or
	49.639	31.205	1.079	0.427		16.165	2.339	0.064						78.9	20.7	0.4
	49.628	31.667	0.771	0.317		16.439	2.252	0.020						80.0	19.8	0.1
	49.464	30.682	0.794	0.294		15.654	2.507	0.058						77.2	22.4	0.3
Cr-Spinel
Sp.1	0.282	0.189	29.807	37.094	0.083	15.914	0.279	16.473	0.067				0.107
Sp.2	0.277	0.206	43.382	22.652	0.038	14.056	0.160	18.916	0.040				0.271
Sp.3	0.341	0.451	33.467	32.139	0.086	15.575	0.365	17.379	0.064				0.002
Sp.4	0.353	0.571	33.494	31.724	0.104	16.093	0.109	16.836	0.079				0.220
Sp.5	0.269	0.236	44.407	22.032	0.092	14.084	0.041	18.842	0.039				0.175
Sp.6	0.296	0.160	46.736	18.812	0.124	14.006	0.043	18.806	0.020
Sp.7	0.265	0.260	39.584	24.636	0.178	16.643	0.155	16.709	0.054				0.122
